# Supplementary material for: Compressive and thermally stable boron nitride aerogels as multifunctional sorbents
Source: Royal Society of Chemistry journal article supplement (doi:10.1039/d1dt02650j), 2021-12-08
Supplement: d1dt02650j1.pdf [file d1dt02650j1.pdf]

## Supplementary Information

### Compressive and Thermally Stable Boron Nitride Aerogel as Multifunctional Sorbent

Dong Xia<sup>a, f</sup>, Huayang Yu<sup>b, f</sup>, Qun Li<sup>c</sup>, Jamie Mannering<sup>a</sup>, Robert Menzel<sup>a</sup>, Peng Huang<sup>d\*</sup> and Heng Li<sup>e\*</sup>

<sup>a</sup> School of Chemistry, University of Leeds, Leeds, LS2 9JT, UK

<sup>b</sup> School of Design, University of Leeds, Leeds, LS2 9JT, UK

<sup>c</sup> Department of Chemical and Biochemical Engineering, College of Chemistry and Chemical Engineering, Xiamen University, Xiamen 361005, China

<sup>d</sup> Department of Materials, University of Manchester, Manchester, M13 9PL, UK

<sup>e</sup> Key Laboratory of Estuarine Ecological Security and Environmental Health, Tan Kah Kee College, Xiamen University, 363105, Zhangzhou, China

<sup>f</sup> These authors contributed equally: Dong Xia, Huayang Yu.

\*Corresponding author: Dr Peng Huang, Email: peng.huang@manchester.ac.uk;  
Dr Heng Li, Email: liheng@xujc.com

#### Experimental section

**Materials:** Boric acid, melamine, dibenzothiophene (DBT) and commercial boron nitride (BN) powder were obtained from Sigma-Aldrich (UK). HPLC water, dioxane, n-octane and hexane were supplied by Fisher Scientific (UK). All chemicals were used as received.

**Synthesis of BN aerogels:** Boric acid (a fixed amount of 0.3156 g was used) and melamine with different mole ratios (2:0.5, 2:1, 2:2, 2:2.5, 2:3) were dissolved in a solution of water/dioxane ( $v/v = 2:1$ ) at 85 °C, with vigorous stirring, until the formation of a uniform mixture. After which, the mixture was transferred into a customised mold (or 15 mL centrifuge tubes) and cooled down to ambient temperature to form hydrogels. Then, the hydrogel-contained mold was immersed in liquid nitrogen, followed by freeze-drying for 48 h to obtain the white aerogel precursor. The aerogel precursor was subsequently annealed in a tube furnace at 1000 °C for 2 h in an  $H_2/N_2$  (5%  $H_2$ ) atmosphere. After cooling down to ambient temperature, the final BN aerogel was obtained as a white solid and stored for subsequent use. According to the nominal mole ratios of the starting materials, the aerogels were designated as BN(2:3) aerogel, BN(2:6) aerogel, BN(2:12) aerogel, BN(2:15) aerogel and BN(2:18) aerogel, respectively.

**Materials characterisation:** Powder X-ray diffraction (XRD) patterns were collected on a Bruker D2 Phaser Diffractometer using  $Cu K\alpha$  radiation. Scanning electron microscopic analyses (SEM) were conducted on a Nova NanoSEM 450 with an accelerating voltage of 3 keV. Specimens were fixed onto aluminium stubs using conductive carbon tapes without coating. Raman spectra of the BN aerogels were collected using a Renishaw InVia Raman microscope with an excitation laser wavelength of 532 nm, between 400 and 4000  $cm^{-1}$ . Infrared spectroscopic analyses (IR) were performed on a PerkinElmer Spectrum One FT-IR spectrometer, with a scanning

range from 550 to 4000  $\text{cm}^{-1}$ . Brunauer-Emmett-Teller (BET) nitrogen adsorption/desorption isotherms were acquired using a Micromeritics TriStar 3000 instrument. The aerogel samples were degassed under  $\text{N}_2$  gas at 110  $^\circ\text{C}$  for 3 hours prior to analysis. Nitrogen adsorption and desorption isotherms were measured at 77 K. The pore diameter distribution of the samples was calculated from the desorption isotherm using the Barrett-Joyner-Halenda (BJH) method. The compression stress-strain curves were measured using an Instron 5566 model mechanical testing machine at a loading speed of 5 mm/min. Thermogravimetric analysis (TGA) was performed on a PerkinElmer Pyris One instrument, under an air atmosphere. The samples were heated from ambient temperature to 900  $^\circ\text{C}$ , at a heating rate of 10  $^\circ\text{C}/\text{min}$ . Transmission electron microscopy (TEM) images were collected from an electron microscope (Tecnai F30, FEI) at an accelerating voltage of 300 kV. X-ray photoelectron spectroscopy (XPS) spectrum was measured on a K-Alpha<sup>+</sup> X-ray photoelectron spectrometer (Thermo Fisher Scientific), using focused (400  $\mu\text{m}$  spot size) monochromatic Al-K $\alpha$  radiation. All the binding energies were referenced to the C1s peak of adventitious carbon at 284.8 eV.

**Bragg's law and Scherrer equation:** The lattice spacing ( $d$ ) was calculated from the XRD peaks (here 002 peak in the XRD patterns) using Bragg's law (Eq. 1). Then, the average crystallite domain size ( $D_p$ ) of the BN aerogels were calculated from the same XRD diffraction peaks, using the Scherrer equation (Eq. 2). When dividing the (002) crystallite domain size,  $D_{002}$  (i.e. the crystallite size in the direction of the BN sheets stacking), by the basal plane spacing of the BN sheet,  $d_{002}$ , the number of BN sheets in the crystallite domain, i.e. the average number of sheets stacked with high crystalline order, can be estimated (layer number =  $D_p/d + 1$ ).

Bragg's law and Scherrer equation: The lattice spacing was determined by Bragg's law using the equation below:

$$2d \cdot \sin \theta = n \cdot \lambda \quad \text{Eq. 1}$$

Where  $d$  is the lattice spacing (nm),  $\theta$  is the diffraction angle,  $\lambda$  is the X-ray wavelength (0.154178 nm), and  $n$  is an integer.

The mean crystallite domain size of the aerogels was calculated using the full-width at half-maximum (FWHM) of the (002) peak. The equation is as follows:

$$D_p = \frac{k \cdot \lambda}{\beta \cdot \cos \theta} \quad \text{Eq. 2}$$

Where  $D_p$  is the mean crystallite domain size (nm) along the (002) direction,  $k$  is a dimensionless shape factor (0.94),  $\beta$  is the FWHM of the peak, and  $\theta$  is the diffraction angle.

**Oil absorption/desorption:** The BN aerogel was placed in n-octane solution (oil) until equilibrium was reached. Afterwards, the aerogel was taken out from the solution using a tweezer. The desorption of the oil was performed by squeezing the aerogel by hand.

**Adsorptive desulfurization measurements:** BN aerogel (20 mg) was added to a DBT-contained (initial DBT concentration of 500 ppm sulfur, 500 ppm·S) n-octane solution (10 mL) and stirred at 20 °C for 3 h. Each measurement was accompanied by a pure DBT reference solution for the subsequent quantification of adsorbed DBT. To determine DBT uptake capacity, the adsorbent/fuel mixtures were centrifuged to remove particles before being measured by gas chromatography (GC, Agilent 7890B GC system with an HP-5 column). All experiments were performed in triplicate and presented using the average values. The removal of adsorbed DBT molecules on BN aerogels were conducted in a tube furnace at 400 °C under a nitrogen atmosphere.

**CO<sub>2</sub> adsorption measurements:** The CO<sub>2</sub> adsorption isotherm was measured on a Quantachrome Autosorb iQ gas adsorption instrument. The BN aerogels were degassed before CO<sub>2</sub> adsorption measurements. The temperature of the adsorption experiment was controlled by a heating circulator.

## Results and discussion

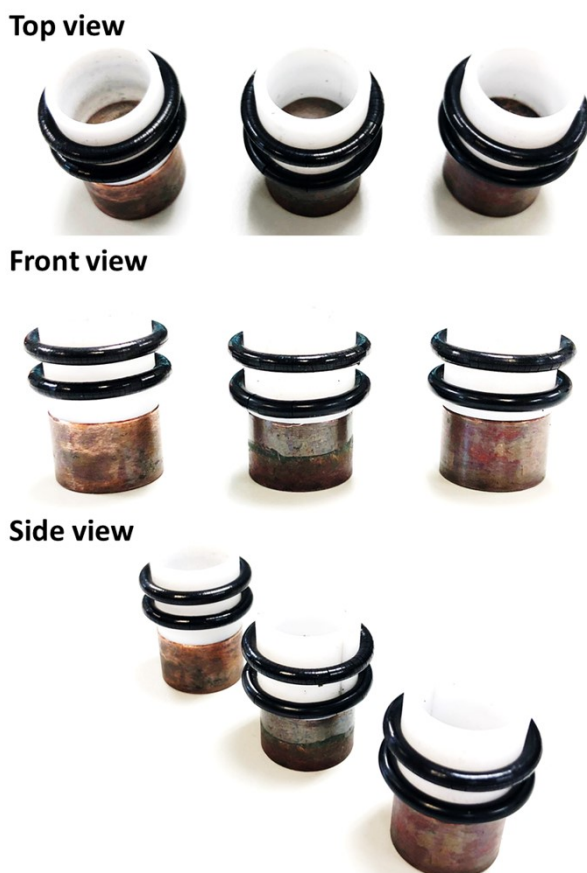

**Fig. S1** Digital photo of customized molds for the preparation of BN aerogels.

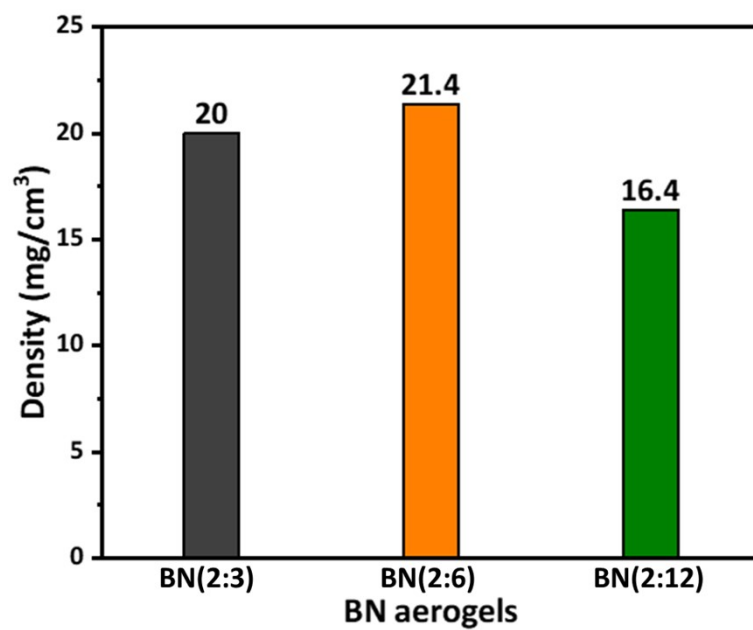

Fig. S2 Density of different BN aerogels.

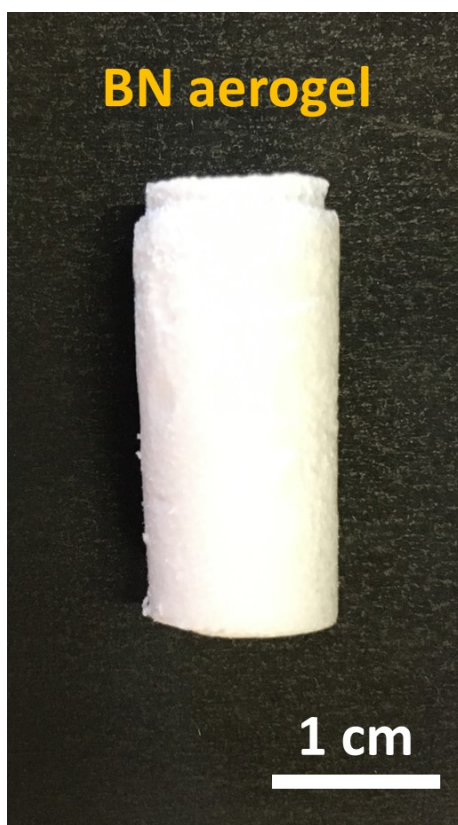

Fig. S3 A digital photo of a BN aerogel prepared in a centrifuge tube.

**Table S1.** Physical properties of the prepared BN aerogels

| Sample           | $D_p$<br>(nm) | $d$<br>(nm) | Number of<br>layers<br>( $n$ ) |
|------------------|---------------|-------------|--------------------------------|
| BN(2:3) aerogel  | 1.29          | 0.35        | 5                              |
| BN(2:6) aerogel  | 1.32          | 0.35        | 5                              |
| BN(2:12) aerogel | 0.79          | 0.36        | 3                              |
| BN(2:15) aerogel | 1.28          | 0.35        | 5                              |
| BN(2:18) aerogel | 1.16          | 0.35        | 4                              |

<sup>a</sup>  $D_p$ , mean crystallite domain size, as calculated from the (002) plane;  $d$ , lattice spacing.

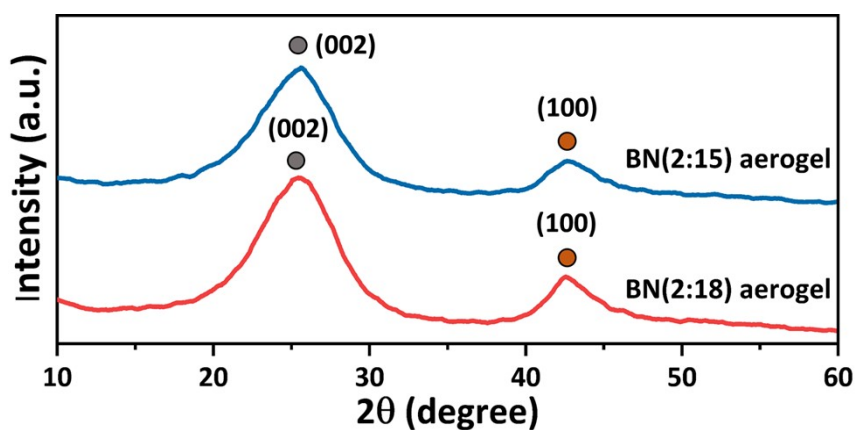**Fig. S4** XRD patterns of BN(2:15) aerogel and BN(2:18) aerogel.

**Fig. S4** exhibits two diffraction peaks attributing to typical (002) and (100) plane of BN aerogels, with the BN(2:15) aerogel and BN(2:18) aerogel showing 5 and 4 layers of BN nanosheets (Table S1), respectively.

**Table S2.** Parameters of the BN aerogels from Raman analyses

| Sample           | Peak position of $E_{2g}$<br>( $cm^{-1}$ ) | $FWHM$<br>( $cm^{-1}$ ) |
|------------------|--------------------------------------------|-------------------------|
| BN(2:3) aerogel  | 1410                                       | 841                     |
| BN(2:6) aerogel  | 1369                                       | 738                     |
| BN(2:12) aerogel | 1371                                       | 770                     |

**Table S3.** Specific surface area and pore volume accumulation of the BN aerogels.

| <i>Sample</i>    | <i>Specific surface area<br/>(m<sup>2</sup>/g)</i> | <i>V<sub>pore</sub><br/>(cm<sup>3</sup>/g)</i> |
|------------------|----------------------------------------------------|------------------------------------------------|
| BN(2:3) aerogel  | 280                                                | 0.065                                          |
| BN(2:6) aerogel  | 938                                                | 0.190                                          |
| BN(2:12) aerogel | 651                                                | 0.251                                          |

**Table S4.** Atomic ratios of C, O, B and N elements in different BN aerogels

| Sample                     | C (atomic %) | O (atomic %) | B (atomic %) | N (atomic %) | B/N ratio | B lost (%) |
|----------------------------|--------------|--------------|--------------|--------------|-----------|------------|
| BN(2:3) aerogel precursor  | 31.2         | 28.8         | 19.2         | 20.8         | 0.95      | --         |
| BN(2:6) aerogel precursor  | 31.5         | 25.5         | 16.4         | 26.6         | 0.62      | --         |
| BN(2:12) aerogel precursor | 35.9         | 15.5         | 8.2          | 40.3         | 0.20      | --         |
| BN(2:3) aerogel            | 8.0          | 13.5         | 46.8         | 31.7         | 1.48      | 46         |
| BN(2:6) aerogel            | 8.7          | 13.5         | 45.7         | 32.1         | 1.42      | 43         |
| BN(2:12) aerogel           | 9.0          | 12.7         | 41.4         | 36.9         | 1.12      | 26         |

The percentage of C/O elements were 8.0%/13.5%, 8.7%/13.5% and 9.0%/12.7% in the BN(2:3) aerogel, BN(2:6) aerogel and BN(2:12) aerogel, respectively. The B/N ratio is significantly increased after the thermal annealing treatment, owing to the release of melamine. Specifically, the B/N ratio in the BN(2:3) aerogel, BN(2:6) aerogel and BN(2:12) aerogel is 1.48, 1.42 and 1.12, respectively. The percentage of B lost during freeze-drying and thermal annealing was 46%, 43%, and 26% in the BN(2:3) aerogel, BN(2:6) aerogel, and BN(2:12) aerogel (Table S4), respectively.

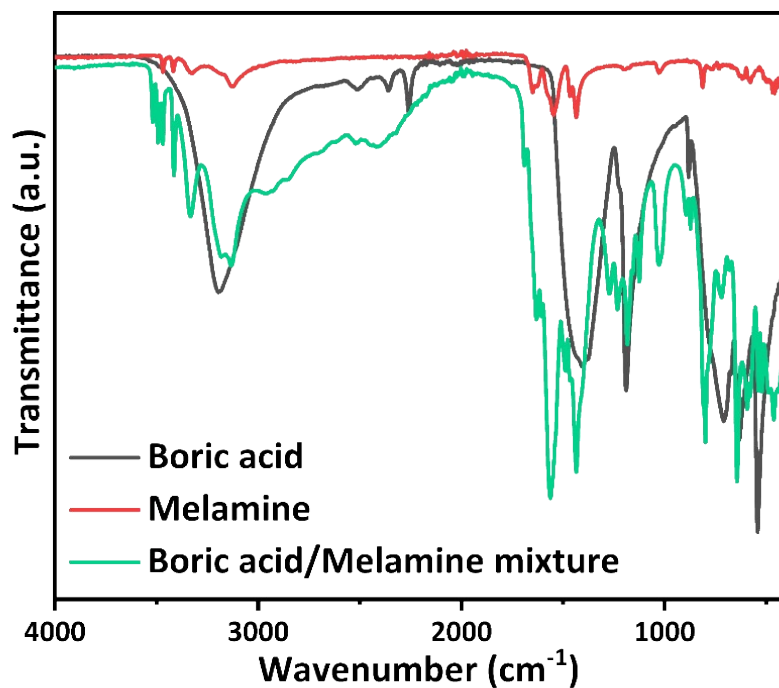

Fig. S5 FT-IR spectra of boric acid, melamine, and boric acid/melamine mixture.

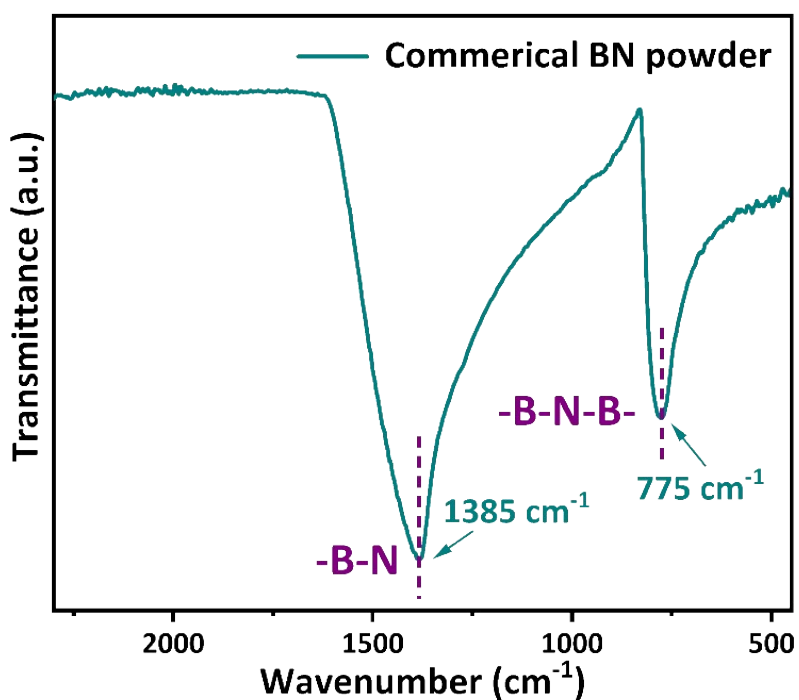

Fig. S6 FT-IR spectrum of commercial BN powder.

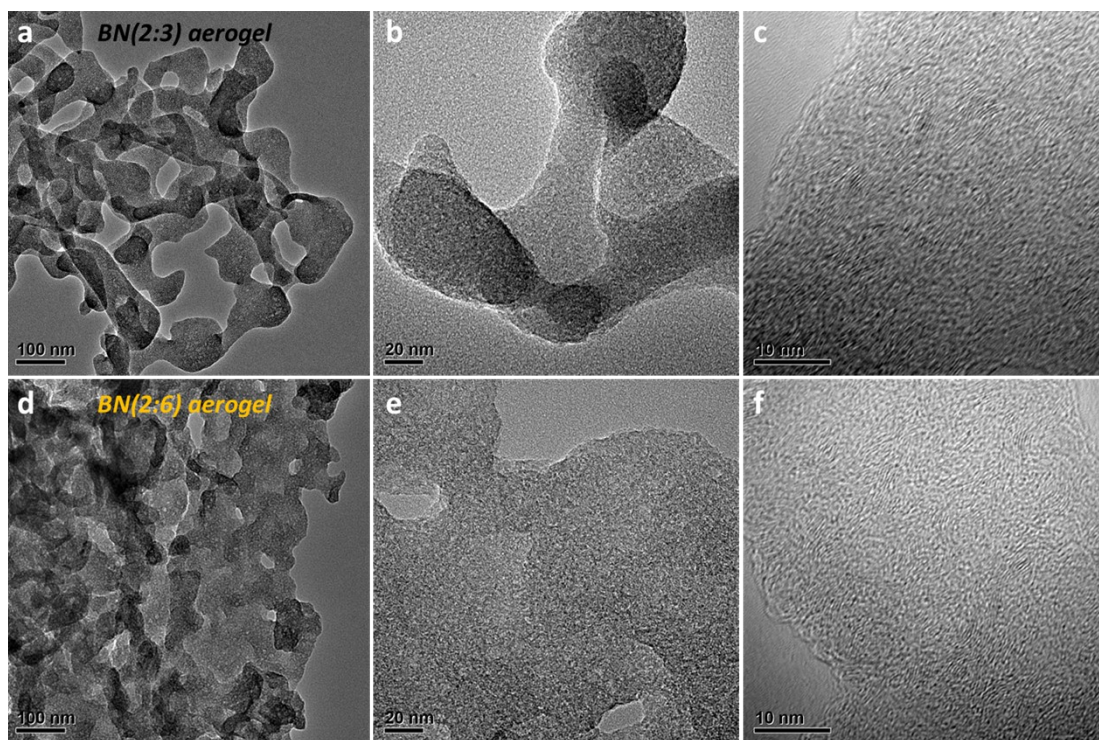

Fig. S7 TEM images of BN(2:3) aerogel (a-c) and BN(2:6) aerogel (d-f) with different magnifications.

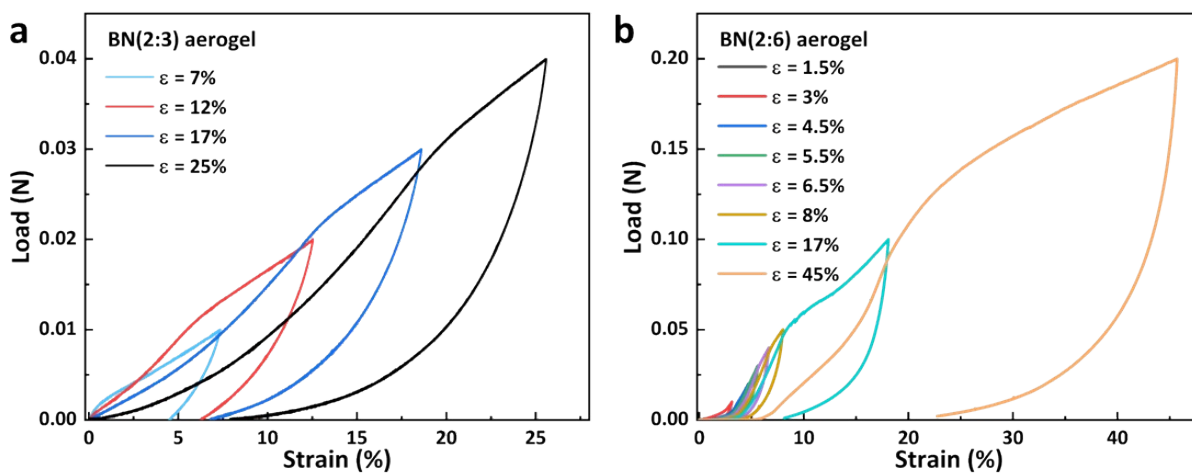

Fig. S8 Load-strain curves of BN(2:3) aerogel and BN(2:6) aerogel.



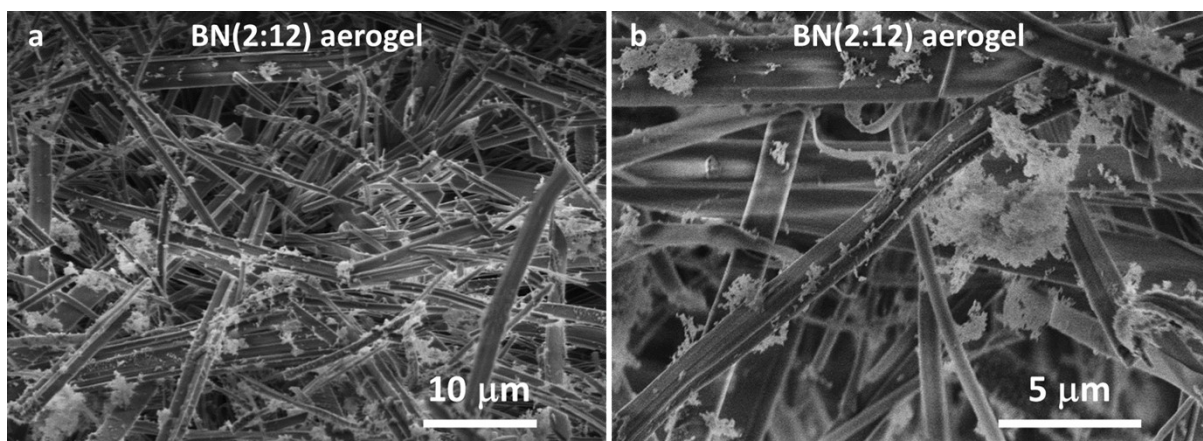

**Fig. S9** SEM images of the BN(2:12) aerogel at low (a) and high (b) magnifications.

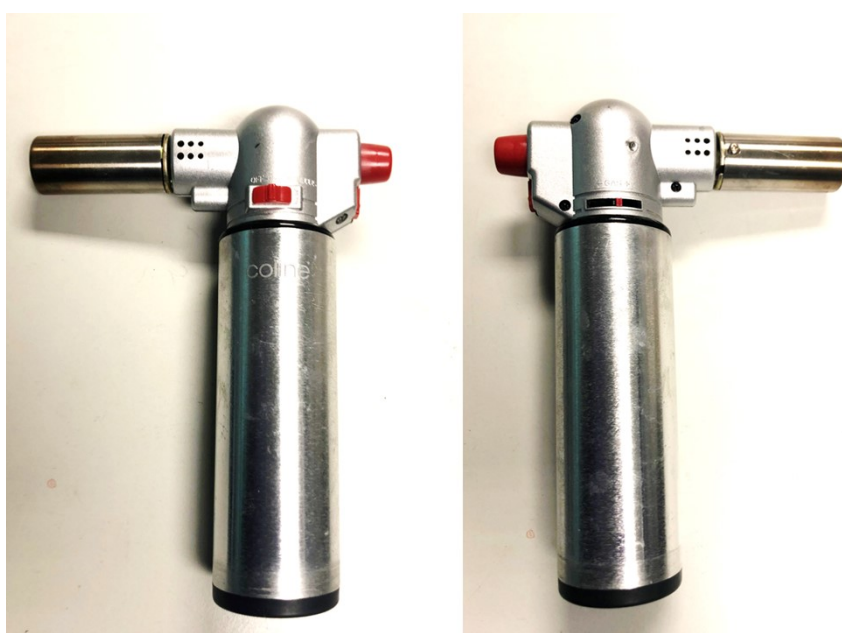

**Fig. S10** Digital photo of the blow torch used for burning BN aerogels.

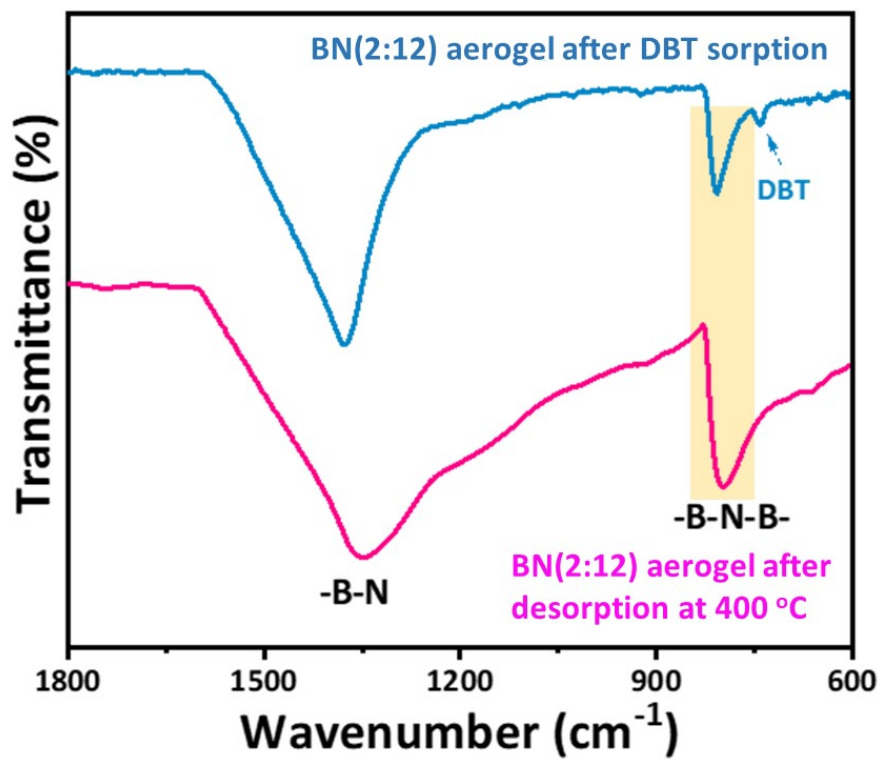

Fig. S11 FT-IR spectra of the BN(2:12) aerogel after DBT adsorption and desorption.
